# Supplementary material
Source: Springer Nature journal article supplement (https://www.springermedizin.de/resource/supplementary/12885_2011_3039_MOESM4_ESM.pdf/9462802)

### GP73 for all HCC vs. controls

| Study        | TP  | FP  | FN  | TN   | cut-off value | assay type  | Sensitivity       | Specificity       |
|--------------|-----|-----|-----|------|---------------|-------------|-------------------|-------------------|
| Hu 2009      | 24  | 15  | 7   | 78   | 7.4           | westernblot | 0.77 [0.59, 0.90] | 0.84 [0.75, 0.91] |
| Mao 2010     | 589 | 89  | 200 | 3339 | 8.5           | immunoblot  | 0.75 [0.71, 0.78] | 0.97 [0.97, 0.98] |
| Marrero 2005 | 100 | 29  | 44  | 179  | 10.0          | immunoblot  | 0.69 [0.61, 0.77] | 0.86 [0.81, 0.90] |
| Morota 2011  | 62  | 60  | 8   | 96   | 94.7          | ELISA       | 0.89 [0.79, 0.95] | 0.62 [0.53, 0.69] |
| Ozkan 2010   | 5   | 4   | 70  | 79   | 2.36          | ELISA       | 0.07 [0.02, 0.15] | 0.95 [0.88, 0.99] |
| Shi2011      | 50  | 5   | 1   | 106  | 100.0         | ELISA       | 0.98 [0.90, 1.00] | 0.95 [0.90, 0.99] |
| Tian 2010    | 115 | 154 | 38  | 165  | 113.8         | ELISA       | 0.75 [0.68, 0.82] | 0.52 [0.46, 0.57] |
| Wang 2009    | 156 | 73  | 8   | 40   |               | immunoblot  | 0.95 [0.91, 0.98] | 0.35 [0.27, 0.45] |

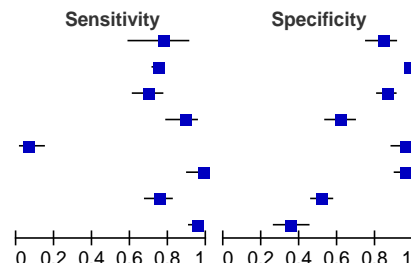

### AFP for all HCC vs. controls

| Study        | TP  | FP  | FN  | TN   | cut-off value | assay type | Sensitivity       | Specificity       |
|--------------|-----|-----|-----|------|---------------|------------|-------------------|-------------------|
| Hu 2009      | 15  | 3   | 16  | 90   | 36.0          | ELISA      | 0.48 [0.30, 0.67] | 0.97 [0.91, 0.99] |
| Mao 2010     | 459 | 504 | 330 | 2924 | 35.0          | ELISA      | 0.58 [0.55, 0.62] | 0.85 [0.84, 0.86] |
| Marrero 2005 | 43  | 8   | 101 | 200  | 99.0          | ELISA      | 0.30 [0.23, 0.38] | 0.96 [0.93, 0.98] |
| Morota 2011  | 44  | 12  | 26  | 144  | 15.3          | ELISA      | 0.63 [0.50, 0.74] | 0.92 [0.87, 0.96] |
| Ozkan 2010   | 62  | 4   | 13  | 79   | 4.36          | ELISA      | 0.83 [0.72, 0.90] | 0.95 [0.88, 0.99] |
| Shi2011      | 21  | 34  | 7   | 100  | 400.0         | ELISA      | 0.75 [0.55, 0.89] | 0.75 [0.66, 0.82] |
| Tian 2010    | 145 | 169 | 8   | 150  | 13.6          | ELISA      | 0.95 [0.90, 0.98] | 0.47 [0.41, 0.53] |
| Wang 2009    | 156 | 89  | 8   | 24   |               | ELISA      | 0.95 [0.91, 0.98] | 0.21 [0.14, 0.30] |

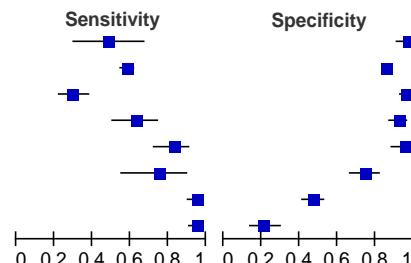

### GP73 for early HCC vs. controls

| Study        | TP  | FP  | FN | TN  | cut-off value | assay type | Sensitivity       | Specificity       |
|--------------|-----|-----|----|-----|---------------|------------|-------------------|-------------------|
| Marrero 2005 | 43  | 25  | 26 | 183 | 10.0          | immunoblot | 0.62 [0.50, 0.74] | 0.88 [0.83, 0.92] |
| Tian 2010    | 88  | 154 | 30 | 165 | 113.8         | ELISA      | 0.75 [0.66, 0.82] | 0.52 [0.46, 0.57] |
| Wang 2009    | 103 | 5   | 64 | 49  |               | immunoblot | 0.62 [0.54, 0.69] | 0.91 [0.80, 0.97] |

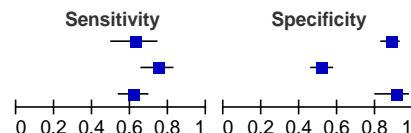

### AFP for early HCC vs. controls

| Study        | TP  | FP  | FN | TN  | cut-off value | assay type | Sensitivity       | Specificity       |
|--------------|-----|-----|----|-----|---------------|------------|-------------------|-------------------|
| Marrero 2005 | 17  | 6   | 52 | 202 | 112.0         | ELISA      | 0.25 [0.15, 0.36] | 0.97 [0.94, 0.99] |
| Tian 2010    | 112 | 169 | 6  | 150 | 13.6          | ELISA      | 0.95 [0.89, 0.98] | 0.47 [0.41, 0.53] |
| Wang 2009    | 103 | 81  | 5  | 32  |               | ELISA      | 0.95 [0.90, 0.98] | 0.28 [0.20, 0.38] |

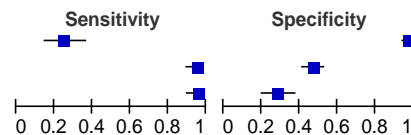

Supplement: MOESM4 [file 9462802]
